# Supplementary material for: A Preliminary Study of Copy Number Variation in Tibetans
Source: PLoS One. 2012 Jul 23;7(7):e41768. doi: 10.1371/journal.pone.0041768 (PMC3402393; doi:10.1371/journal.pone.0041768)
Supplement: Table S2 — Genomic qPCR validation of the 16 novel CNVRs identified in Tibetans. (XLS) [file pone.0041768.s002.xls]

## Sheet: Sheet1
Table S2. Genomic qPCR validation of the 16 novel CNVRs identified in Tibetans
CNVR ID	Chr	Start	Stop	Size	Variant Type	CNV value	Mean qPCR ration (SD)	Validation	PCR primer
									forward	reverse
4	1	67125759	67225623	99864	deletion	1	0.956(0.108)	validated	AATGCTGAAGAAAAGTGGGT	TGTCTGGTGTAGCTGGTGGG
7	1	153171464	153256921	85457	deletion	1	0.973(0.035)	validated	AGAGGTGTTTAGTTCAAGCA	GGGTAGTGACATTCTATTTA
15	3	47039440	47218239	178799	deletion	1	0.909(0.106)	validated	TCTTGGGATGGTGTTTCTTC	GCCTGAATGCAAAGTTGATA
24	4	74199525	74344854	145329	deletion	1	0.982(0.064)	validated	CCTTTGTACTGTTCTTTGGC	CTCTCAGGTTCTTGTTTTGC
26	4	146239475	146317890	78415	deletion	1	0.996(0.053)	validated	TTCATCCCAGTTGACCTACC	CACATTTAACCCTGCCCTTC
28	4	182410255	182525054	114799	deletion	1	2.044(0.189)	fail	TGCAGCTAGAAGCAGATGAA	AAATGTGCCGACAAAAAACT
33	5	119556786	119653934	97148	deletion	1	1.028(0.065)	validated	TAATAGGCTCTGTTTTTTTC	AGCTTATAGTTTCTTGGTTT
36	6	17243046	17379875	136829	duplication	3	2.836(0.236)	validated	TTACAATCAGGATTTGGGGT	AGGTGAGCTTGAAAAGGGAG
42	6	111650637	111950241	299604	deletion	1	0.980(0.095)	validated	GGTGAGCAGCATCCAATACA	AAGGTGCAACCCACTTACAA
43	6	135300635	135460998	160363	deletion	1	1.099(0.069)	validated	TTCATGTATTCACTCCGTTC	ATCCTTCTTTATGATGCTGA
45	6	149679383	149777048	97665	deletion	1	1.008(0.120)	validated	CCATAAAGTTGTGGGGGAAA	TGCAGCATACTAGTGAGGAT
60	8	66866382	67007297	140915	deletion	1	0.935(0.268)	validated	AAAGAGTAAAAGAGAAGGGC	AAGGCAAGGTAAAGAAAACA
91	14	52629402	52706537	77135	deletion	1	1.987(0.068)	fail	TTATTTCCTCTTGTCCCTCC	ACTGACCTAACACACACCTG
98	15	38782627	38864621	81994	duplication	3	3.351(0.081)	validated	TCTGAAAAACTCTTGTGAAC	GTAAAGGTGAAGTGTGAATA
131	X	94317860	94563268	245408	duplication	3	2.635(0.426)	validated	CACTAACAGAGTAAAAATCA	TGTCCAGTTCATAGAAAAAT
133	X	101267093	101612187	345094	duplication	2	1.989(0.156)	validated	GGTTAGGGAGAAGGAGTGTT	TTGTGGTATAATTGAGGAGA
ZNF80									CTGTGACCTGCAGCTCATCCT	TAAGTTCTCTGACGTTGACTGATGTG
GRP15									GGTCCCTGGTGGCCTTAATT	TTGCTGGTAATGGGCACACA
